# Supplementary material for: Baicalin inhibits infectious bronchitis virus via Mitochondrial Antiviral Signaling protein-mediated signaling
Source: Research Square preprint supplement (doi:10.21203/rs.3.rs-5571011/v1), 2024-12-23
Supplement: Supplementary file 1 [file 61c893f0fb96767721444761.pdf]

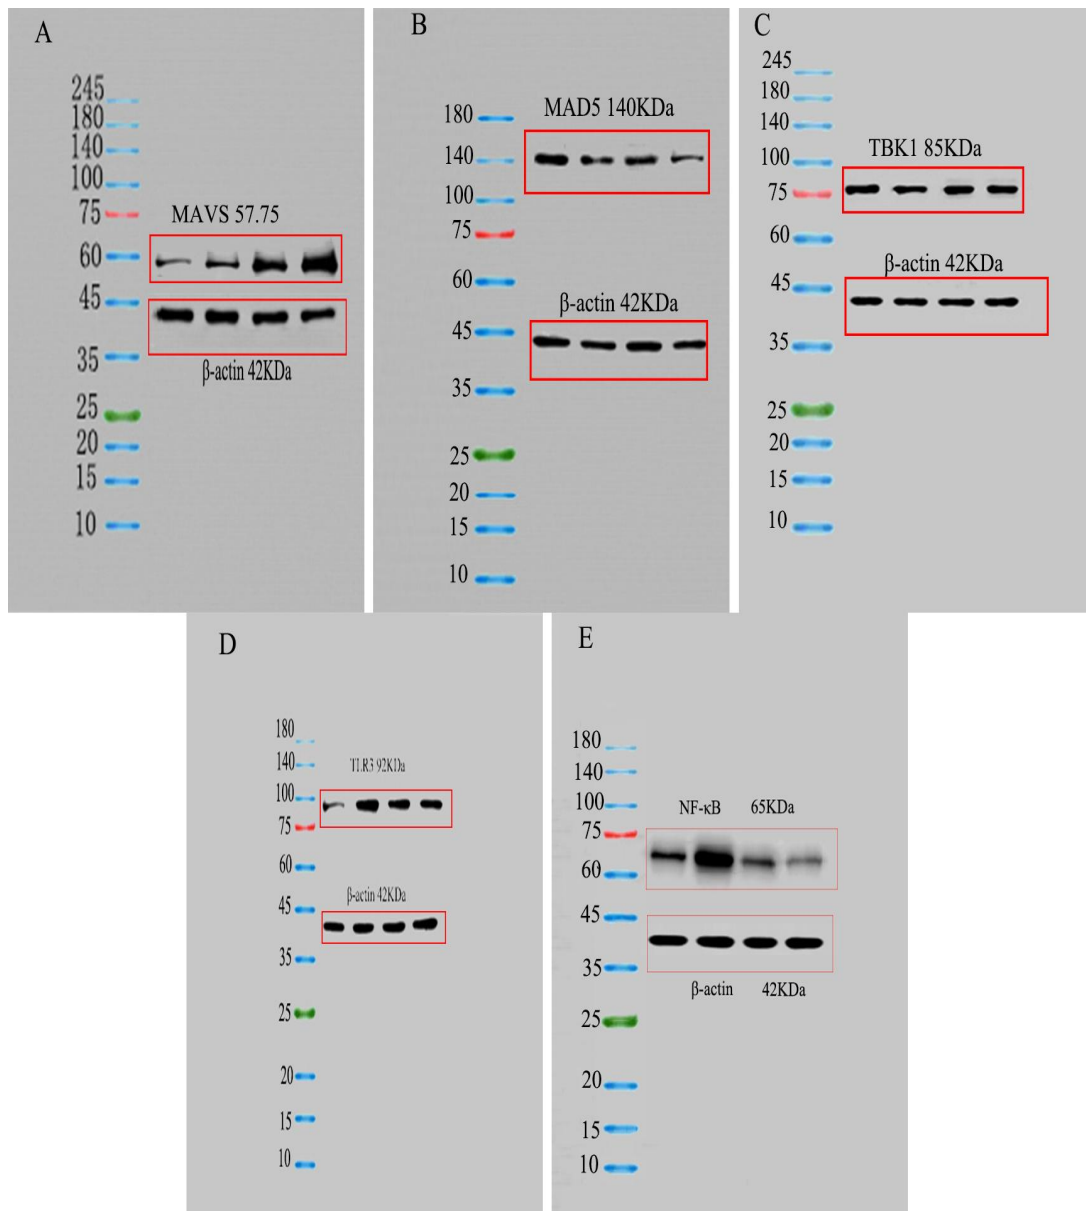

**Additional figure 1.** Effects of baicalin on the expression of type I interferon-related genes in vitro. Chicken embryonic kidney cells were incubated with infectious bronchitis virus (IBV) at a concentration of 100 TCID<sub>50</sub> at 37°C for 2 h. Cells were then incubated with 10 and 20 µg/mL baicalin for 36 h. Chicken embryonic kidney cells treated with M199 and 100 TCID<sub>50</sub> IBV were used as controls. Expression of MAVS, MDA5, TBK1, NF-κB, and TLR3 was detected at translational by western blot. A, Expression of MAVS was detected at translational levels by WB; B, Expression of MDA5 was detected at translational levels by WB; C, Expression of TBK1 was detected at translational levels by WB; D, Expression of NF-κB was detected at translational levels by WB; E, Expression of TLR3 was detected at translational levels by WB.
