# Supplementary material for: Baicalin inhibits infectious bronchitis virus via Mitochondrial Antiviral Signaling protein-mediated signaling
Source: Research Square preprint supplement (doi:10.21203/rs.3.rs-5571011/v1), 2024-12-23
Supplement: Supplementary file 1 [file b3d8b5ad190e968bf7a26298.xlsx]

## Sheet: Sheet1
Additional table 1 Primers of cloning, siRNA and PCR
Purpose	Name	Sequence (5’ to3’)
Silencing of MAVS	MAVS F	CCACCUUGAUGCCUGUGAA
	MAVS R	CAGAGGAGAAUGAGUAUAA
Silencing of Mfn1	Mfn1 F	GCGUGAACAGGAGCUUCAUTT
	Mfn1 R	GACCAGCAACAACGUAUCATT
Silencing of Mfn2	Mfn2 F	GCUGAAUUCUUCUCUGAUATT
	Mfn2 R	GGUAGAAGGCAUUUAUACATT
Silencing of TOM70	TOM70 F	GGACAUGAACUCUCUUGAT
	TOM70 R	UAAUACGACUCACUAUAGGG
Silencing of VDAC1	VDAC1 F	GAAUAGCAGCCAAGUAUCAG
	VDAC1 R	UGAUACUUGGCUGCUAUU
Silencing of TRADD	TRADD F	GGAGCAAACUGAAUAAUGAUU
	TRADD R	GGAGGAUGCGCUGCGAAAUUU
Silencing of FADD	FADD F	GUGCAAGUGCAAACCAGACUU
	FADD R	GUCUGGUUUGCACUUGCACUU
Silencing of Atg5	Atg5 F	UUCUCCGAACGUGUCACGUAA
	Atg5 R	CAACCGGAAACUCAUGGAAUU
Silencing of Atg12	Atg12 F	AUAAUCUGCAUGACCAGGG
	Atg12 R	CCCUGGUCAUGCAGAUUAUUU
Real-time PCR	MAVS F	CCTGACTCAAACAAGGGAAG
	MAVS R	AATCAGAGCGATGCCAACAG
Real-time PCR	TBK1 F	GACATCAAACCAGGCAACATCAT
	TBK1 R	TCCTCAAGACTGCTCGCTCATAC
Real-time PCR	TLR3 F	GCCCAGCGGCCCCATGCTGGAGGAG
	TLR3 R	CTCCTCCAGCATGGGGCCGCTGGGC
Real-time PCR	Mfn1 F	AGCCCGGCCTCGTTTGGCCCTATCC
	Mfn1 R	GGATAGGGCCAAACGAGGCCGGGCT
Real-time PCR	Mfn2 F	GCTGATGTATTTGTTCTGGTGGCAA
	Mfn2 R	TTGCCACCAGAACAAATACATCAGC
Real-time PCR	VDAC1 F	CTGACAACACACTGGGAACTGACAT
	VDAC1 R	ATCTCAGTTCCCAGTGTGTGTTGTCAG
Real-time PCR	TRADD F	CGCCTGCGGGACGAGGAGATCAC
	TRADD R	CCGTGATCTCCTCGTCCCGCAG
Real-time PCR	FADD F	CATCTCAACCCAAATCAC
	FADD R	AAGGCACTTGTAAGGAAT
Real-time PCR	Atg5 F	TATCAGGCAACAACAGAG
	Atg5 R	TAGCCAAGTTTCAATCAG
Real-time PCR	Atg12 F	CCACAGAAATACTTCCTCCTA
	Atg12 F	CCATCACGCCTTCCTAAC
Cloning of MDA5	MDA5 F1	AAAGATATCTATGTCGGAGGAGTGCCGA (EcoR V)
	MDA5 R1	AATCTAGAGGATCCCTTCTTTTGTCATC (Xba I)
Cloning of MAVS	MAVS F1	AGCGGCCGCCAAAAGAAGGGATCCATTTAGAG(Not I)
	MAVS R1	CTAGTCTAGATTAATCTTCATCACTTGAAGGACAA (XbaI)
Cloning of TBK1	TBK1 F1	GAATTCATGTTTTCCGGGGACGACATAACAA (EcoR I)
	TBK1 R1	TCTAGAGTTTCCACCGTGTCCTGT (Xba I)
Cloning of TLR3	TLR3 F1	ATAAGAATGCGGCCGCTAAACTAATGGGATGCTCTATTCCTTGCT (NotI)
	TLR3 R1	AAAGATATCAATCAGCGCACTTTACTATTAGATTTAAG (EcoRV)
Cloning of NF-κB	NF-κB F1	ATGAATTCGCAGGAGAGGATCCGTATATTA (EcoR I)
	NF-κB R1	GGATCCAGCTAAATGCAATGCCGTTCGTCTAA (BamH I)
Cloning of Mfn1	Mfn1 F	GAATTCATGGCGGAGGCCGCCGTGTCCCCGC (EcoR I)
	Mfn1 R	TCTAGAGGGAAACTACAGCCTACCACATAG(Xba I)
Cloning of Mfn2	Mfn2 F	TCTAGATGGCGGTGCTGCGGGAGCGGCGGT(Xba I)
	Mfn2 R	CCCGGGCATCTGCCAATGCTCCACCTCCTAG（SmaI）
Cloning of TOM70	TOM70 F	GCGGCCGCATGGCCGCCTCGAAGCCCG(NotI)
	TOM70 R	GAATTCTGATTTCGGATCACGTCAGTCA (XbaI)
Cloning of VDAC1	VDAC1 F	GAATTCATGGCTGTTCCACCTGCTTA (EcoR I)
	VDAC1 R	GGATCCAAGCGTTCTGGAGACAGCTG(BamH I)
Cloning of TRADD	TRADD F	AGATCTATGGCAGGTAGCTCAACTC（BglⅡ）
	TRADD R	GATATCTGGGAAGCAGAGCACCTCA(EcoRV)
Cloning of FADD	FADD F	GGTACCATGAGCGGCCTGACATGAAGGAA（kpnⅠ）
	FADD R	CTCTAGAGAGGGTAATCTTCTAAACTAG（Xba1）
Cloning of Atg5	Atg5 F	GCGGCCGCATGAGATAACTGAGAGGGAA(NotI)
	Atg5 R	GAATTCTAACGCAACTGAAGTTTAATT(EcoR I)
Cloning of Atg12	Atg12 F	GCGGCCGCATGGCCTCTGAGCAGCTGTTT(NotI)
	Atg12 R	GAATTCGGCTATTCCACAAGCATGCTT(EcoR I)
