# Supplementary material for: Baicalin inhibits infectious bronchitis virus via Mitochondrial Antiviral Signaling protein-mediated signaling
Source: Research Square preprint supplement (doi:10.21203/rs.3.rs-5571011/v1), 2024-12-23
Supplement: Supplementary file 2 [file da475ddba0fa3a5b3e118888.pdf]

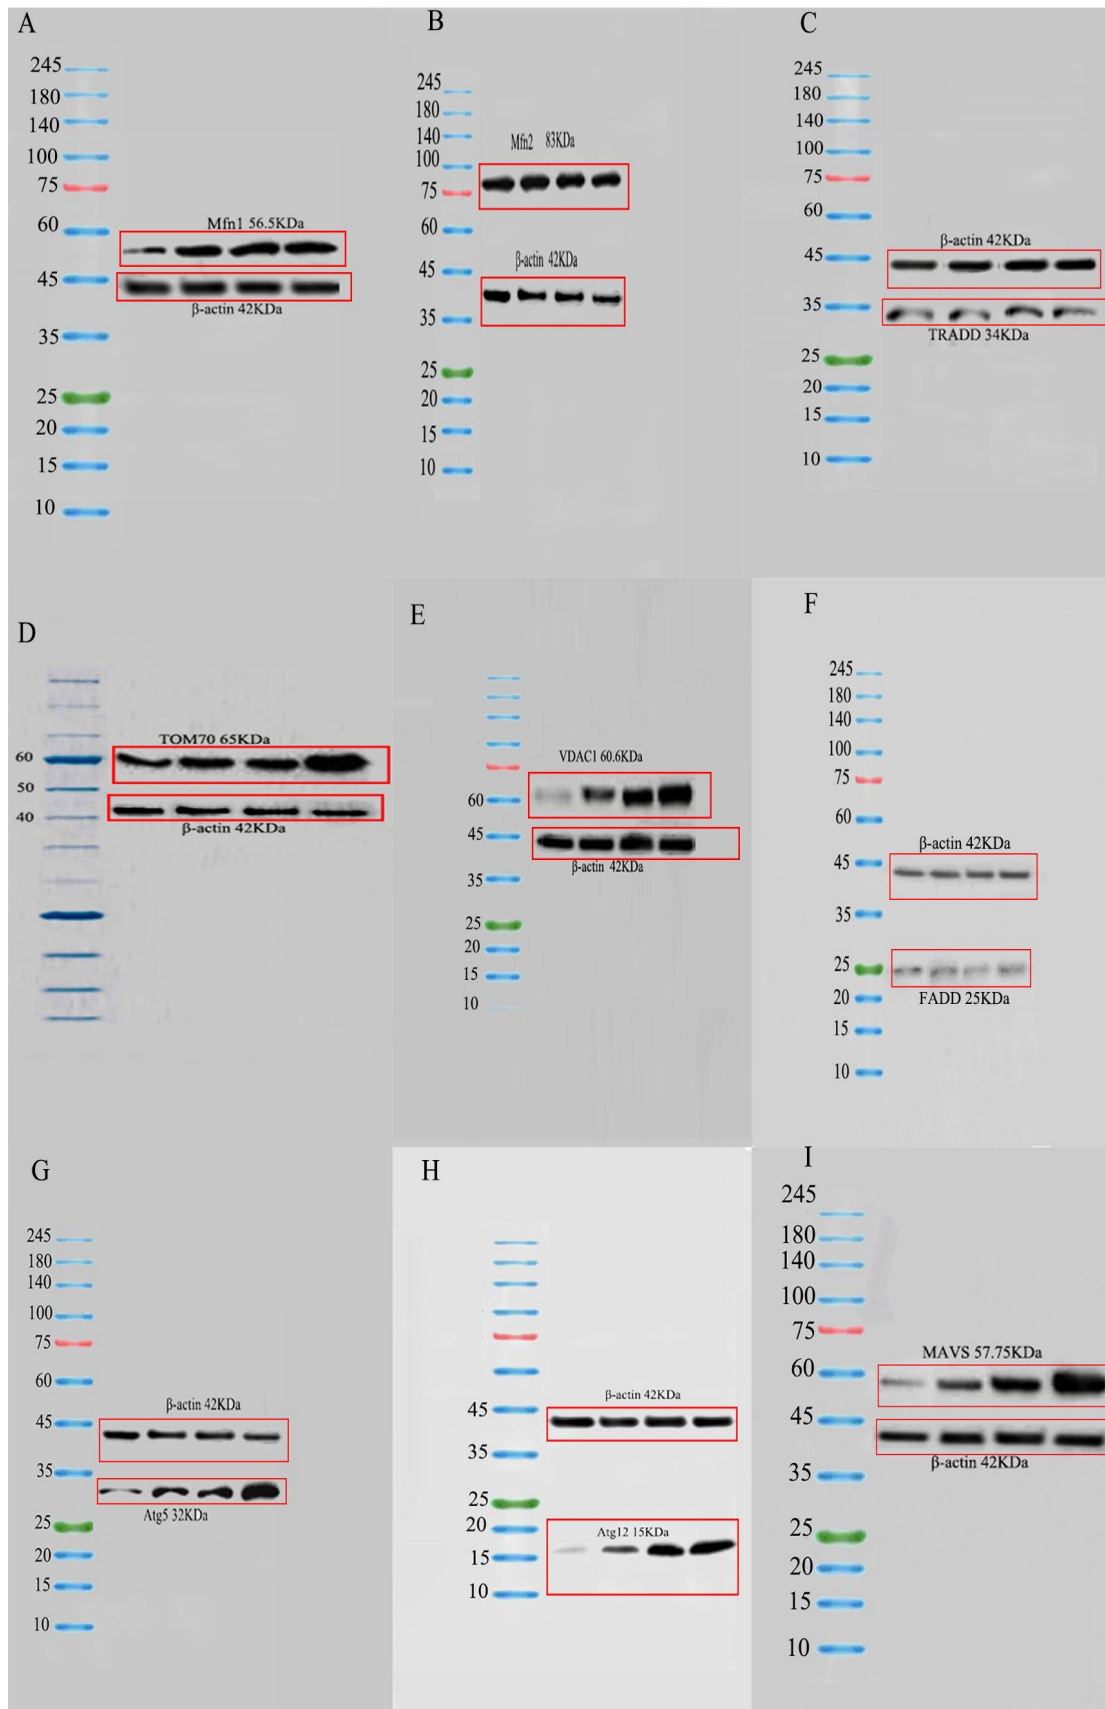

Additional figure2. Changes in expression of Mfn1, Mfn2, TOM70, VDAC1, TRADD, FADD, Atg5 and Atg12 at translational levels in chicken embryonic kidney cells infected with infectious bronchitis virus and treated with

baicalin. Expression of genes was detected at translational levels by WB. A, Mfn1; B, Mfn2; C, TRADD; D, TOM70; E, VDAC1; F, FADD; G, Atg5; H, Atg12; I, MAVS.
